# Supplementary material
Source: PubMed Central journal article supplement (PMC6108845)
Supplement: EHP3389.s001.acco.pdf [file EHP3389.s001.acco.pdf]

**Note to readers with disabilities:** *EHP* strives to ensure that all journal content is accessible to all readers. However, some figures and Supplemental Material published in *EHP* articles may not conform to [508 standards](#) due to the complexity of the information being presented. If you need assistance accessing journal content, please contact [ehp508@niehs.nih.gov](mailto:ehp508@niehs.nih.gov). Our staff will work with you to assess and meet your accessibility needs within 3 working days.

### **Supplemental Material**

#### **Correlates of the Built Environment and Active Travel: Evidence from 20 US Metropolitan Areas**

Huyen T.K. Le, Ralph Buehler, and Steve Hankey

#### **Table of Contents**

**Table S1.** Count data by metropolitan area, season, and count method.

**Table S2.** Number of bicycle and pedestrian count locations by peak-period and location type (fall counts only).

**Table S3.** Direct-demand model results for bicycle and pedestrian volumes in 20 US metropolitan areas (with unstandardized coefficients).

**Table S4.** Correlation analysis of variables included in the core models.

**Table S5.** Sensitivity analysis 1: Temporally averaged model results (with standardized coefficients).

**Table S6.** Sensitivity analysis 1: Temporally averaged model results (with unstandardized coefficients).

**Table S7.** Sensitivity analysis 2: Disaggregate employment data model results (with standardized coefficients).

**Table S8.** Sensitivity analysis 2: Disaggregate employment data model results (with unstandardized coefficients).

**Table S9.** Correlation analysis of employment types.

**Figure S1.** Scatter plots of predicted vs. observed values for the temporally averaged models. The dashed red line is the 1:1 line; the best fit line is shown in solid black.

**Figure S2.** Scatter plots of predicted vs. observed values for disaggregated employment type models. The dashed red line is the 1:1 line; the best fit line is shown in solid black.

**Figure S3.** Cross validation (CV) results: Plots of predicted vs. observed values of AM peak-period models for each cross-validation approach. The dashed red line is the 1:1 line; the best fit line is shown in solid black.

**Figure S4.** Cross validation results: Box plots of MSE and adjusted  $R^2$  for the PM models. Model abbreviations: Bicycle, random hold-out (Bike Rand.CV); Pedestrian, random hold-out (Ped Rand.CV); Bicycle, systematic hold-out (Bike Sys.CV); Pedestrian, systematic hold-out (Ped Sys.CV). The whiskers represent the min and max values, the boxes represent the 25, 50, and 75 percentile values of all cross-validated models' MSE and  $R^2$ .

Table S1. Count data by metropolitan area, season, and count method

| Metropolitan Area                 | Bicycle Count |                   | Pedestrian Count |              | Level of aggregation <sup>d</sup> | Hour(s)      | Year(s)          | Number of years | Count Method       | Date of Access from Google Earth    |
|-----------------------------------|---------------|-------------------|------------------|--------------|-----------------------------------|--------------|------------------|-----------------|--------------------|-------------------------------------|
|                                   | Non-fall      | Fall <sup>c</sup> | Non-fall         | Fall         |                                   |              |                  |                 |                    |                                     |
| Blacksburg, VA <sup>a</sup>       |               | 202               |                  | 144          | Disaggregate                      | 7-9AM, 5-7PM | 2015             | 1               | Automated          | N/A. Reported in the count database |
| Boston, MA                        | 162           | 84                | 44               | 25           | Aggregate                         | 7-9AM, 5-7PM | 1999-2015        | 17              | Manual             | 1-2/2017                            |
| Champaign Urbana, IL <sup>b</sup> |               | 660               |                  | 242          | Aggregate                         | 7-9AM, 5-7PM | 2011-2016        | 6               | Manual             | 3/2017                              |
| Cleveland, OH                     | 51            | 82                | 51               | 81           | Aggregate                         | 5-7PM        | 2011-2014        | 4               | Manual             | N/A. Reported in the count database |
| Columbus, OH                      | 237           | 220               | 237              | 220          | Aggregate                         | 7-9AM        | 2005-2016        | 12              | Manual             | 2/2017                              |
| Denver, CO <sup>a</sup>           | 79            | 122               |                  |              | Aggregate                         | 7-9AM, 4-6PM | 2015             | 1               | Manual             | 3/2017                              |
| Hartford, CT                      |               | 76                |                  | 76           | Aggregate                         | 4-6PM        | 2015-2016        | 2               | Manual             | 3/2017                              |
| Lawrence, KS <sup>a</sup>         |               | 109               |                  | 109          | Aggregate                         | 5-7PM        | 2012-2016        | 5               | Manual             | 3/2017                              |
| Los Angeles, CA                   | 199           | 1,870             |                  |              | Disaggregate                      | 7-9AM, 5-7PM | 2008-2016        | 9               | Manual             | 3/2017                              |
| Madison, WI <sup>b</sup>          | 265           | 381               | 66               | 146          | Aggregate                         | 7-9AM, 4-6PM | 2010-2016        | 7               | Manual & Automated | 5/2017                              |
| Manhattan, KS <sup>a</sup>        |               | 112               |                  | 112          | Aggregate                         | 4-6PM        | 2014-2016        | 3               | Manual             | 5/2017                              |
| Minneapolis, MN <sup>a</sup>      |               | 950               |                  | 950          | Aggregate                         | 4-6PM        | 2007-2014        | 8               | Manual             | N/A. Reported in the count database |
| New York City, NY <sup>a</sup>    | 43            |                   | 2,303            | 2,044        | Disaggregate                      | 7-9AM, 5-7PM | 2006-2016        | 11              | Manual             | N/A. No bicycle count data.         |
| Philadelphia, PA <sup>b</sup>     | 443           | 384               | 308              | 327          | Disaggregate                      | 7-9AM, 5-7PM | 2010-2016        | 7               | Automated          | 3/2017                              |
| Portland, OR                      |               | 91                |                  | 91           | Disaggregate                      | 4-6PM        | 2008-2009        | 2               | Manual             | 4/2017                              |
| San Francisco, CA <sup>a</sup>    |               | 1,554             |                  | 80           | Disaggregate                      | 4-6PM        | 2006-2015        | 10              | Manual & Automated | 5/2017                              |
| Seattle, WA                       |               | 608               |                  | 610          | Disaggregate                      | 7-9AM, 4-6PM | 2010, 2015       | 2               | Manual & Automated | 8/2017                              |
| St Louis, MO                      |               | 142               |                  | 238          | Aggregate                         | 5-7PM        | 2012-2015        | 4               | Manual             | 5/2017                              |
| Tucson, AZ <sup>a</sup>           |               | 2,126             | 92               | 2,149        | Disaggregate                      | 7-9AM, 4-6PM | 2006-2015        | 10              | Manual & Automated | 8/2017                              |
| Washington, DC <sup>a,b</sup>     | 851           | 128               | 62               | 20           | Disaggregate                      | 7-9AM, 4-6PM | 2008-2016        | 9               | Manual & Automated | 8/2017                              |
| <b>Total</b>                      | <b>2,330</b>  | <b>9,901</b>      | <b>3,163</b>     | <b>7,664</b> |                                   |              | <b>1999-2016</b> | <b>18</b>       |                    |                                     |

<sup>a</sup> Jurisdictions where counts were mostly collected in the central city.

<sup>b</sup> Jurisdictions where traffic was counted in each direction. The remainder were bidirectional (i.e., screenline count), or all directions (i.e., intersection count).

<sup>c</sup> Fall includes August to November. Non-fall includes all other months.

<sup>d</sup> Aggregate level: count data received in 2-hour period at the time of acquisition. Disaggregate level: count data received in 15-minute intervals at the time of acquisition.

Note: Data were derived from raw traffic count data obtained from each jurisdiction or from the National Bicycle and Pedestrian Documentation Project (NBPDP) from 1999 to 2016. For coding bicycle facilities, all count locations were cross-checked with multiple databases (e.g., shapefiles, Google Maps, Google Street View's historical views) in addition to Google Earth.

Table S2. Number of bicycle and pedestrian count locations by peak-period and location type (fall counts only)

| MSAs                 | Bicycle      |              |              |              | Pedestrian |              |            |              |
|----------------------|--------------|--------------|--------------|--------------|------------|--------------|------------|--------------|
|                      | AM Seg.      | PM Seg.      | AM Int.      | PM Int.      | AM Seg.    | PM Seg.      | AM Int.    | PM Int.      |
| Blacksburg, VA       | 101          | 101          |              |              | 72         | 72           |            |              |
| Boston, MA           | 26           | 27           | 3            | 4            | 7          | 7            | 4          | 3            |
| Champaign Urbana, IL | 255          | 255          | 64           | 64           |            |              | 120        | 120          |
| Cleveland, OH        |              | 54           |              |              |            | 54           |            |              |
| Columbus, OH         | 36           |              | 4            |              | 36         |              | 4          |              |
| Denver, CO           |              |              | 47           | 73           |            |              |            |              |
| Hartford, CT         | 1            | 11           | 3            | 58           | 1          | 11           | 3          | 58           |
| Lawrence, KS         |              | 70           |              |              |            | 70           |            |              |
| Los Angeles, CA      | 400          | 315          | 336          | 363          |            |              |            |              |
| Madison, WI          | 29           | 28           | 15           | 68           | 29         | 28           |            |              |
| Manhattan, KS        |              |              |              | 68           |            |              |            | 68           |
| Minneapolis, MN      |              | 469          |              |              |            | 469          |            |              |
| New York City, NY    |              |              |              |              | 114        | 114          |            |              |
| Philadelphia, PA     | 158          | 158          |              |              | 129        | 134          |            |              |
| Portland, OR         |              | 36           |              | 28           |            | 36           |            | 28           |
| San Francisco, CA    |              | 326          |              | 87           |            |              |            | 45           |
| Seattle, WA          | 16           | 5            | 254          | 249          | 16         | 5            | 256        | 249          |
| St Louis, MO         |              |              |              | 44           |            |              |            | 76           |
| Tucson, AZ           | 2            | 2            | 489          | 493          | 1          | 1            | 583        | 577          |
| Washington, DC       | 52           | 52           | 10           | 10           |            |              | 10         | 10           |
| <b>Total</b>         | <b>1,076</b> | <b>1,909</b> | <b>1,225</b> | <b>1,609</b> | <b>405</b> | <b>1,001</b> | <b>980</b> | <b>1,234</b> |

Abbreviations: Morning count at street segment (AM Seg.); Afternoon count at street segment (PM Seg.); Morning count at intersections (AM Int.); Afternoon count at street intersection (PM Int.). Afternoon intersection model (PM Int.). Morning peak period is 7-9AM. Afternoon peak period is 5-7PM or 4-6PM. Data were derived from raw traffic count data obtained from each jurisdiction or from the National Bicycle and Pedestrian Documentation Project (NBPDP) from 1999 to 2016. Fall includes August to November.

Table S3. Direct-demand model results for bicycle and pedestrian volumes in 20 US metropolitan areas (with unstandardized coefficients) <sup>a</sup>

| Independent variable                                     | Bicycle Models |                |               |              | Pedestrian Models |                |              |               |
|----------------------------------------------------------|----------------|----------------|---------------|--------------|-------------------|----------------|--------------|---------------|
|                                                          | AM Seg.        | PM Seg.        | AM Int.       | PM Int.      | AM Seg.           | PM Seg.        | AM Int.      | PM Int.       |
| Water and green space (ha)                               | 0.02 (300m)    | 0.04 (200m)    | 0.02 (400m)   | 0.01 (500m)  | -0.06 (300m)      |                |              | 0.03 (500m)   |
| Household density (thousand households/km <sup>2</sup> ) |                |                |               |              | 0.05 (1000m)      |                |              | 0.04 (1000m)  |
| Total number of jobs (thousand jobs)                     |                | 0.004 (300m)   | 0.002 (300m)  | 0.005 (200m) | 0.01 (400m)       |                | 0.04 (500m)  | 0.03 (400m)   |
| University/college campus (ha)                           |                |                | 0.02 (400m)   | 0.04 (300m)  |                   | 0.01 (500m)    |              | 0.06 (300m)   |
| Off-street bike facility                                 | 1.52           | 1.15           | 0.19          | 0.16         |                   |                |              |               |
| On-street bike facility                                  | 0.49           | 0.47           | 0.06          | 0.09         |                   |                |              |               |
| Minor bike facility                                      |                |                | 0.06          | 0.07         |                   |                |              |               |
| Intersection density (miles/sq mile)                     |                | 0.001 (400m)   |               | 0.01 (2500m) |                   | 0.01 (750m)    |              | 0.01 (1500m)  |
| Multimodal network density (miles/sq mile)               | 0.47 (3000m)   | 0.02 (100m)    | 0.13 (3000m)  | 0.04 (500m)  | 0.01 (100m)       | 0.01 (100m)    |              | 0.08 (100m)   |
| Local road (km)                                          | -0.004 (3000m) | -0.10 (200m)   |               |              |                   | 0.02 (1250m)   | 0.01 (2000m) | 0.03 (750m)   |
| Bike commute mode share (%)                              | 0.11 (750m)    | 0.09 (1000m)   | 0.09 (3000m)  | 0.05 (750m)  | -                 | -              | -            | -             |
| Walking commute mode share (%)                           | -              | -              | -             | -            |                   | 0.02 (100m)    | 0.04 (100m)  | 0.02 (400m)   |
| Transit stops                                            | -              | -              | -             | -            | 0.01 (400m)       | -0.002 (3000m) | 0.11 (100m)  | 0.12 (100m)   |
| Transit commute mode share (%)                           | -              | -              | -             | -            | -0.09 (3000m)     |                |              | -0.05 (3000m) |
| Zero-car households (thousand households)                | 0.08 (1000m)   |                |               | 2.57 (100m)  |                   | 0.04 (3000m)   |              | 9.49 (100m)   |
| Income (thousand dollars)                                | 0.01 (3000m)   | -0.002 (1000m) | 0.01 (2500m)  |              | -0.01 (2000m)     |                |              | -0.01 (100m)  |
| Population below 18 years old                            |                |                | -0.04 (3000m) | -0.01 (500m) |                   |                |              |               |
| Population 19-45 years old                               |                | 0.01 (500m)    |               |              |                   | 0.01 (100m)    |              |               |
| Population 45-65 years old                               | -0.03 (100m)   |                | -0.02 (500m)  | -0.01 (100m) | -0.01 (100m)      | 0.02 (100m)    |              |               |
| Population above 65 years old                            | -0.02 (500m)   | 0.01 (100m)    | -0.01 (100m)  | -0.01 (300m) |                   | 0.02 (3000m)   |              |               |
| Temperature                                              | 0.01           | -0.01          |               |              | 0.02              |                |              |               |
| Precipitation                                            | -0.12          |                |               | 0.11         |                   |                |              |               |
| Year dummies                                             |                |                |               |              |                   |                |              |               |
| Year 2005                                                | -0.59          | -0.56          |               |              |                   |                |              |               |
| Year 2006                                                | -1.14          | -0.27          |               |              |                   |                |              |               |
| Year 2007                                                | -0.68          |                |               | 0.38         |                   |                |              |               |
| Year 2009                                                |                | -0.29          |               |              |                   |                |              |               |
| Year 2010                                                | -0.32          |                |               | 0.19         | -0.35             |                |              |               |
| Year 2011                                                | -0.57          |                |               | 0.24         |                   |                |              |               |
| Year 2012                                                | -0.64          | 0.22           |               | 0.16         |                   |                |              |               |
| Year 2013                                                |                |                | -0.26         | -0.13        |                   |                |              | -0.14         |
| Year 2014                                                |                | 0.31           | -0.24         | -0.14        |                   |                |              |               |
| Year 2015                                                |                |                |               | -0.63        | -0.84             | -1.01          |              |               |
| Midwest region                                           |                |                | 0.95          | 0.92         |                   |                |              |               |
| Northeast region                                         |                | -0.81          |               |              |                   | 0.92           |              | 0.70          |
| Ohio Valley                                              |                | -0.46          | -0.71         |              |                   |                | -0.85        | -0.28         |
| South region                                             |                |                |               |              |                   | -0.91          |              |               |
| Southeast region                                         |                | -2.04          |               |              |                   |                |              |               |
| Southwest region                                         |                |                | 0.99          |              |                   |                |              |               |
| West region                                              | 0.34           |                | 1.07          | 0.53         |                   |                |              |               |

| Independent variable     | Bicycle Models                                        |                                                                                     |                                                      |                                                                        | Pedestrian Models                                       |                                                                               |                                          |                                                                |
|--------------------------|-------------------------------------------------------|-------------------------------------------------------------------------------------|------------------------------------------------------|------------------------------------------------------------------------|---------------------------------------------------------|-------------------------------------------------------------------------------|------------------------------------------|----------------------------------------------------------------|
|                          | AM Seg.                                               | PM Seg.                                                                             | AM Int.                                              | PM Int.                                                                | AM Seg.                                                 | PM Seg.                                                                       | AM Int.                                  | PM Int.                                                        |
| <b>N</b>                 | <b>1,126</b>                                          | <b>3,279</b>                                                                        | <b>1,915</b>                                         | <b>2,533</b>                                                           | <b>1,545</b>                                            | <b>2,526</b>                                                                  | <b>1,202</b>                             | <b>1,657</b>                                                   |
| <b>Adj-R<sup>2</sup></b> | <b>0.50</b>                                           | <b>0.46</b>                                                                         | <b>0.49</b>                                          | <b>0.61</b>                                                            | <b>0.61</b>                                             | <b>0.72</b>                                                                   | <b>0.42</b>                              | <b>0.60</b>                                                    |
| MSAs <sup>b</sup>        | BBG, BOS,<br>COL, LA,<br>MAD, PHI,<br>SEA, TUC,<br>DC | BBG, BOS,<br>CLE, HAR,<br>LAW, LA,<br>MAD, MIN,<br>PHI, POR, SF,<br>SEA, TUC,<br>DC | BOS, CU,<br>COL, HAR,<br>LA, MAD,<br>SEA, TUC,<br>DC | BOS, DEN,<br>HAR, LA,<br>MAD, MAN,<br>POR, SF,<br>SEA, STL,<br>TUC, DC | BBG, BOS,<br>COL, HAR,<br>MAD, NYC,<br>PHI, SEA,<br>TUC | BBG, BOS,<br>CLE, HAR,<br>LAW, MAD,<br>MIN, NYC,<br>PHI, POR, SF,<br>SEA, TUC | BOS, CU,<br>COL, HAR,<br>SEA, TUC,<br>DC | BOS, CU,<br>HAR, LAW,<br>MAN, POR,<br>SF, SEA, STL,<br>TUC, DC |

<sup>a</sup> Buffer sizes are shown in parentheses. All dependent variables were log-transformed. All independent variables were significant at  $p < 0.05$  level. Reference year is 1999, reference climate region is Northwest. Insignificant years and regions were not shown in the table. Units are included in the list of independent variables in Table 1 in the main text. Model abbreviations: Morning segment model (AM Seg.); Afternoon segment model (PM Seg.); Morning intersections model (AM Int.); Afternoon intersection model (PM Int.). Afternoon intersection model (PM Int.). Morning peak period is 7-9AM. Afternoon peak period is 5-7PM or 4-6PM.

<sup>b</sup> City abbreviations: Blacksburg (BBG), Boston (BOS), Champaign-Urbana (CU), Cleveland (CLE), Columbus (COL), Denver (DEN), Hartford (HAR), Lawrence (LAW), Los Angeles (LA), Madison (MAD), Manhattan (MAN), Minneapolis (MIN), New York City (NYC), Philadelphia (PHI), Portland (POR), San Francisco (SF), Seattle (SEA), St Louis (STL), Tucson (TUC), Washington DC (DC). Champaign-Urbana (CU) was excluded from the PM Intersection model because its count dates were unknown, thus we did not have weather variables for this MSA.

Table S4. Correlation analysis of variables included in the core models

| <b>Bicycle AM Segment</b> |        |                  |                  |                 |                 |                |               |               |               |               |              |         |         |
|---------------------------|--------|------------------|------------------|-----------------|-----------------|----------------|---------------|---------------|---------------|---------------|--------------|---------|---------|
|                           | Inbike | Greenwat<br>_300 | OffStreet<br>Seg | OnStreet<br>Seg | D3amm<br>_3000w | Rd_lc<br>_3000 | Bikep<br>_750 | Car0<br>_1000 | Inc<br>_3000w | A65p<br>_100w | AXp<br>_500w | temp_ss | prcp_ss |
| Inbike                    | 1      |                  |                  |                 |                 |                |               |               |               |               |              |         |         |
| greenwat_300              | 0.10   | 1                |                  |                 |                 |                |               |               |               |               |              |         |         |
| OffStreetSeg              | 0.17   | 0.24             | 1                |                 |                 |                |               |               |               |               |              |         |         |
| OnStreetSeg               | 0.13   | -0.08            | -0.14            | 1               |                 |                |               |               |               |               |              |         |         |
| D3amm_3000w               | 0.37   | 0.00             | -0.24            | 0.05            | 1               |                |               |               |               |               |              |         |         |
| Rd_lc3000                 | 0.17   | -0.12            | -0.29            | 0.07            | 0.77            | 1              |               |               |               |               |              |         |         |
| Bikep_750                 | 0.33   | 0.10             | 0.00             | 0.00            | 0.05            | -0.02          | 1             |               |               |               |              |         |         |
| Car0_1000                 | 0.23   | -0.11            | -0.19            | 0.07            | 0.57            | 0.68           | 0.08          | 1             |               |               |              |         |         |
| Inc_3000w                 | 0.03   | 0.02             | 0.25             | -0.04           | -0.23           | -0.21          | -0.33         | -0.06         | 1             |               |              |         |         |
| A65p_100w                 | -0.20  | -0.01            | 0.09             | 0.02            | -0.14           | -0.14          | -0.33         | -0.10         | 0.34          | 1             |              |         |         |
| AXp_500w                  | 0.10   | 0.40             | 0.21             | -0.02           | 0.00            | -0.12          | 0.07          | -0.05         | 0.16          | 0.16          | 1            |         |         |
| temp_ss                   | 0.05   | -0.05            | 0.01             | 0.06            | 0.15            | 0.13           | -0.41         | 0.03          | 0.14          | 0.02          | -0.01        | 1       |         |
| prcp_ss                   | -0.28  | -0.07            | 0.12             | 0.00            | -0.47           | -0.27          | 0.05          | -0.24         | -0.05         | -0.25         | -0.15        | -0.02   | 1       |

| <b>Bicycle PM Segment</b> |        |                  |                |                  |                 |              |                |               |                |               |               |              |         |
|---------------------------|--------|------------------|----------------|------------------|-----------------|--------------|----------------|---------------|----------------|---------------|---------------|--------------|---------|
|                           | Inbike | Greenwat<br>_200 | EmpTot<br>_300 | OffStreet<br>Seg | OnStreet<br>Seg | D3b<br>_400w | D3amm<br>_100w | Rd_lc<br>_200 | Bikep<br>_1000 | Inc<br>_1000w | A45p<br>_500w | AXp<br>_100w | temp_ss |
| Inbike                    | 1      |                  |                |                  |                 |              |                |               |                |               |               |              |         |
| greenwat_200              | 0.09   | 1                |                |                  |                 |              |                |               |                |               |               |              |         |
| EmpTot_300                | 0.46   | -0.11            | 1              |                  |                 |              |                |               |                |               |               |              |         |
| OffStreetSeg              | 0.16   | 0.24             | -0.19          | 1                |                 |              |                |               |                |               |               |              |         |
| OnStreetSeg               | 0.23   | -0.10            | 0.17           | -0.19            | 1               |              |                |               |                |               |               |              |         |
| D3b_400w                  | 0.34   | 0.09             | 0.48           | -0.15            | 0.13            | 1            |                |               |                |               |               |              |         |
| D3amm_100w                | 0.23   | -0.08            | 0.46           | -0.16            | 0.10            | 0.30         | 1              |               |                |               |               |              |         |
| Rd_lc200                  | 0.12   | -0.35            | 0.39           | -0.31            | 0.13            | 0.43         | 0.30           | 1             |                |               |               |              |         |
| Bikep_1000                | 0.36   | -0.06            | 0.25           | -0.04            | 0.17            | 0.23         | -0.01          | 0.19          | 1              |               |               |              |         |
| Inc_1000w                 | 0.02   | 0.09             | 0.13           | -0.02            | 0.05            | 0.18         | 0.09           | 0.14          | 0.06           | 1             |               |              |         |
| A45p_500w                 | 0.22   | 0.00             | 0.26           | -0.07            | 0.11            | 0.25         | 0.04           | 0.05          | 0.32           | -0.14         | 1             |              |         |





---

**Bicycle PM Intersection**

|               | Inbike | Greenwat<br>_500 | EmpTot<br>_200 | Uni<br>_300 | OffStreet<br>Int | OnStreet<br>Int | MinorFacil<br>Int | D3b<br>_2500w | D3amm<br>_500w | Bikep<br>_750 | Car0<br>_100 | A18p<br>_500w | A65p<br>_100w | AXp<br>_300w | prep_ss |
|---------------|--------|------------------|----------------|-------------|------------------|-----------------|-------------------|---------------|----------------|---------------|--------------|---------------|---------------|--------------|---------|
| OnStreetInt   | -0.04  | -0.10            | -0.11          | -0.03       | -0.16            | 1               |                   |               |                |               |              |               |               |              |         |
| MinorFacilInt | 0.16   | -0.02            | 0.16           | -0.03       | -0.07            | -0.09           | 1                 |               |                |               |              |               |               |              |         |
| D3b_2500w     | 0.56   | -0.01            | 0.61           | 0.13        | -0.19            | -0.12           | 0.23              | 1             |                |               |              |               |               |              |         |
| D3amm_500w    | 0.47   | 0.13             | 0.63           | -0.09       | -0.02            | -0.10           | 0.11              | 0.53          | 1              |               |              |               |               |              |         |
| Bikep_750     | 0.45   | 0.03             | 0.17           | 0.25        | 0.06             | -0.06           | 0.13              | 0.45          | 0.15           | 1             |              |               |               |              |         |
| Car0_100      | 0.39   | 0.01             | 0.48           | -0.10       | -0.10            | -0.13           | 0.18              | 0.52          | 0.43           | 0.12          | 1            |               |               |              |         |
| A18p_500w     | -0.48  | -0.13            | -0.43          | -0.36       | 0.00             | 0.11            | -0.06             | -0.46         | -0.31          | -0.43         | -0.37        | 1             |               |              |         |
| A65p_100w     | -0.20  | -0.04            | 0.01           | -0.52       | -0.04            | 0.10            | -0.04             | -0.07         | 0.10           | -0.37         | 0.04         | 0.24          | 1             |              |         |
| AXp_300w      | -0.13  | 0.19             | -0.07          | -0.26       | 0.14             | 0.10            | -0.07             | -0.25         | -0.04          | -0.14         | -0.10        | -0.15         | 0.10          | 1            |         |
| prep_ss       | 0.17   | 0.19             | -0.05          | 0.12        | 0.30             | -0.09           | -0.05             | -0.22         | 0.04           | 0.24          | -0.03        | -0.13         | -0.17         | 0.05         | 1       |

---

**Pedestrian AM Segment**

|              | Inped | Greenwat<br>_300 | HH<br>_1000 | EmpTot<br>_400 | D3amm<br>_100w | Stop<br>_400 | PTrp<br>_3000 | Inc<br>_2000w | A65p<br>_100w | temp_ss |
|--------------|-------|------------------|-------------|----------------|----------------|--------------|---------------|---------------|---------------|---------|
| Inped        | 1     |                  |             |                |                |              |               |               |               |         |
| greenwat_300 | -0.22 | 1                |             |                |                |              |               |               |               |         |
| HH_1000      | 0.67  | -0.12            | 1           |                |                |              |               |               |               |         |
| EmpTot_400   | 0.44  | -0.20            | 0.45        | 1              |                |              |               |               |               |         |
| D3amm_100w   | 0.16  | 0.25             | 0.07        | -0.02          | 1              |              |               |               |               |         |
| Stop_400     | 0.27  | -0.28            | 0.13        | 0.59           | -0.01          | 1            |               |               |               |         |
| PTrp_3000    | -0.55 | 0.00             | -0.52       | -0.15          | -0.08          | -0.05        | 1             |               |               |         |
| Inc_2000w    | 0.21  | -0.11            | 0.37        | 0.46           | 0.00           | 0.16         | -0.17         | 1             |               |         |
| A65p_100w    | 0.05  | -0.34            | 0.07        | 0.04           | -0.14          | 0.03         | -0.19         | 0.34          | 1             |         |
| temp_ss      | 0.15  | -0.01            | 0.13        | 0.05           | 0.02           | 0.00         | -0.11         | 0.11          | 0.05          | 1       |



---

**Pedestrian PM Intersection**

|                   | <i>lnped</i> | <i>Greenwat</i><br>500 | <i>HH</i><br>1000 | <i>EmpTot</i><br>400 | <i>Uni</i><br>300 | <i>D3b</i><br>1500w | <i>D3amm</i><br>100w | <i>Rd_lc</i><br>750 | <i>Walkp</i><br>400 | <i>Stop</i><br>100 | <i>PTrp</i><br>3000 | <i>Car0</i><br>100 | <i>Inc</i><br>100w |
|-------------------|--------------|------------------------|-------------------|----------------------|-------------------|---------------------|----------------------|---------------------|---------------------|--------------------|---------------------|--------------------|--------------------|
| <i>Uni_300</i>    | 0.36         | -0.14                  | 0.00              | 0.04                 | 1                 |                     |                      |                     |                     |                    |                     |                    |                    |
| <i>D3b_1500w</i>  | 0.63         | 0.02                   | 0.55              | 0.43                 | 0.19              | 1                   |                      |                     |                     |                    |                     |                    |                    |
| <i>D3amm_100w</i> | 0.37         | 0.08                   | 0.44              | 0.40                 | -0.13             | 0.45                | 1                    |                     |                     |                    |                     |                    |                    |
| <i>Rd_lc750</i>   | 0.45         | -0.13                  | 0.43              | 0.29                 | 0.15              | 0.59                | 0.23                 | 1                   |                     |                    |                     |                    |                    |
| <i>Walkp_400</i>  | 0.53         | -0.07                  | 0.28              | 0.32                 | 0.74              | 0.40                | 0.06                 | 0.38                | 1                   |                    |                     |                    |                    |
| <i>Stop_100</i>   | 0.27         | 0.04                   | 0.37              | 0.19                 | 0.05              | 0.15                | 0.21                 | 0.18                | 0.12                | 1                  |                     |                    |                    |
| <i>PTrp_3000</i>  | 0.06         | -0.17                  | -0.17             | 0.04                 | 0.42              | 0.10                | -0.18                | 0.37                | 0.48                | -0.14              | 1                   |                    |                    |
| <i>Car0_100</i>   | 0.45         | 0.03                   | 0.73              | 0.24                 | -0.06             | 0.45                | 0.35                 | 0.38                | 0.28                | 0.27               | -0.10               | 1                  |                    |
| <i>Inc_100w</i>   | -0.20        | 0.20                   | 0.03              | -0.04                | -0.31             | -0.20               | 0.06                 | -0.25               | -0.32               | 0.16               | -0.38               | 0.00               | 1                  |

Notes: Variable names: *lnbike*: log of bicycle count; *lnped*: log of pedestrian count; *greenwat*: water and green space; *HH*: household density; *EmpTot*: total number of jobs; *Uni*: university/college campus; *OffStreet*: off street bike facility; *OnStreet*: onstreet bike facility; *MinorFacil*: minor bike facility (*Seg* for segment, *Int* for intersection); *D3b*: intersection density; *D3amm*: Multimodal network density; *Rd\_lc*: local road; *Bikep*: bike commute mode share; *Walkp*: walking commute mode share; *Stop*: transit stop; *PTrp*: transit commute mode share; *Car0*: zero-car household; *Inc*: income; *A18p*: population under 18 years old; *A45p*: population 19-45 years old; *A65p*: population 46-65 years old; *AXp*: population above 65 years old; *temp\_ss*: temperature; *prcp\_ss*: precipitation. Numbers after underscore represent buffer sizes in meter.

Table S5. Sensitivity analysis 1: Temporally averaged model results (with standardized coefficients) <sup>a</sup>

| Independent variable          | Bicycle                                  |                                                           |                      |                                  | Pedestrian                    |                                            |                  |                      |
|-------------------------------|------------------------------------------|-----------------------------------------------------------|----------------------|----------------------------------|-------------------------------|--------------------------------------------|------------------|----------------------|
|                               | AM Seg.                                  | PM Seg.                                                   | AM Int.              | PM Int.                          | AM Seg.                       | PM Seg.                                    | AM Int.          | PM Int.              |
| Water and green space         |                                          |                                                           |                      | 0.11 (100m)                      |                               |                                            | 0.14 (400m)      | 0.16 (1500m)         |
| Household density             |                                          |                                                           |                      |                                  | 0.39 (1000m)                  |                                            | 0.26 (1000m)     | 0.24 (750m)          |
| Total number of jobs          |                                          | 0.38 (300m)                                               |                      | 0.34 (300m)                      |                               | 0.27 (400m)                                | 0.15 (400m)      |                      |
| University/college campus     |                                          |                                                           |                      |                                  |                               | 0.05 (500m)                                |                  | 0.17 (300m)          |
| Off-street bike facility      | 0.25                                     | 0.37                                                      | 0.15                 |                                  |                               |                                            |                  |                      |
| On-street bike facility       |                                          | 0.13                                                      |                      |                                  |                               |                                            |                  |                      |
| Minor bike facility           |                                          |                                                           |                      |                                  |                               |                                            |                  |                      |
| Intersection density          |                                          |                                                           |                      |                                  |                               | 0.11 (200m)                                |                  | 0.34 (1250m)         |
| Multimodal network density    |                                          |                                                           |                      |                                  | 0.03 (100m)                   | 0.05 (300m)                                |                  |                      |
| Local road                    |                                          |                                                           |                      | 0.14 (100m)                      | 0.32 (200m)                   |                                            |                  |                      |
| Bike commute mode share       |                                          | 0.16 (1250m)                                              |                      |                                  | -                             | -                                          | -                | -                    |
| Walking commute mode share    | -                                        | -                                                         | -                    | -                                |                               |                                            |                  |                      |
| Transit stops                 | -                                        | -                                                         | -                    | -                                | -0.24 (3000m)                 | -0.13 (3000m)                              |                  |                      |
| Transit commute mode share    | -                                        | -                                                         | -                    | -                                |                               |                                            |                  |                      |
| Zero-car households           |                                          |                                                           |                      |                                  |                               | 0.28 (200m)                                |                  |                      |
| Income                        |                                          |                                                           | 0.23 (3000m)         | 0.11 (3000m)                     |                               |                                            |                  |                      |
| Population below 18 years old | -0.03 (100m)                             |                                                           | -0.39 (2000m)        | -0.33 (3000m)                    | -0.22 (1000m)                 |                                            |                  |                      |
| Population 19-45 years old    |                                          |                                                           |                      |                                  |                               |                                            | 0.48 (1000m)     |                      |
| Population 45-65 years old    | -0.28 (1250m)                            |                                                           | -0.33 (500m)         | -0.34 (500m)                     |                               |                                            |                  |                      |
| Population above 65 years old |                                          |                                                           | -0.20 (200m)         | -0.11 (500m)                     | -0.15 (3000m)                 |                                            |                  |                      |
| Temperature                   |                                          |                                                           |                      |                                  |                               |                                            |                  |                      |
| Precipitation                 | -0.39                                    |                                                           |                      | 0.11                             |                               |                                            |                  |                      |
| <b>N</b>                      | <b>57</b>                                | <b>311</b>                                                | <b>159</b>           | <b>235</b>                       | <b>154</b>                    | <b>221</b>                                 | <b>97</b>        | <b>166</b>           |
| <b>Adj-R<sup>2</sup></b>      | <b>0.40</b>                              | <b>0.39</b>                                               | <b>0.40</b>          | <b>0.61</b>                      | <b>0.60</b>                   | <b>0.71</b>                                | <b>0.44</b>      | <b>0.65</b>          |
| MSAs <sup>b</sup>             | BOS, COL,<br>LA, MAD,<br>PHI, TUC,<br>DC | BOS, CLE,<br>LAW, LA,<br>MAD, MIN,<br>PHI, SF,<br>TUC, DC | COL, LA,<br>MAD, TUC | LA, MAD,<br>MAN, SF,<br>STL, TUC | COL, MAD,<br>NYC, PHI,<br>TUC | CLE, LAW,<br>MAD, MIN,<br>NYC, PHI,<br>TUC | BOS, COL,<br>TUC | MAN, SF,<br>STL, TUC |

<sup>a</sup> Buffer sizes are shown in parentheses. All dependent variables were log-transformed. The standardized coefficients are interpreted as percent change in the 5th – 95th percentile range of pedestrian or bicycle volume. All independent variables were significant at  $p < 0.05$  level. All models included climate region as control variable. Model abbreviations: Morning segment model (AM Seg.); Afternoon segment model (PM Seg.); Morning intersections model (AM Int.); Afternoon intersection model (PM Int.). Afternoon intersection model (PM Int.). Morning peak period is 7-9AM. Afternoon peak period is 5-7PM or 4-6PM.

<sup>b</sup> City abbreviations: Blacksburg (BBG), Boston (BOS), Champaign-Urbana (CU), Cleveland (CLE), Columbus (COL), Denver (DEN), Hartford (HAR), Lawrence (LAW), Los Angeles (LA), Madison (MAD), Manhattan (MAN), Minneapolis (MIN), New York City (NYC), Philadelphia (PHI), Portland (POR), San Francisco (SF), Seattle (SEA), St Louis (STL), Tucson (TUC), Washington DC (DC).

Table S6. Sensitivity analysis 1: Temporally averaged model results (with unstandardized coefficients) <sup>a</sup>

| Independent variable                                     | Bicycle                                  |                                                           |                      |                                  | Pedestrian                    |                                            |                  |                      |
|----------------------------------------------------------|------------------------------------------|-----------------------------------------------------------|----------------------|----------------------------------|-------------------------------|--------------------------------------------|------------------|----------------------|
|                                                          | AM Seg.                                  | PM Seg.                                                   | AM Int.              | PM Int.                          | AM Seg.                       | PM Seg.                                    | AM Int.          | PM Int.              |
| Water and green space (ha)                               |                                          |                                                           |                      | 0.34 (100m)                      |                               |                                            | 0.07 (400m)      | 0.01 (1500m)         |
| Household density (thousand households/km <sup>2</sup> ) |                                          |                                                           |                      |                                  | 0.05 (1000m)                  |                                            | 0.38 (1000m)     | 0.38 (750m)          |
| Total number of jobs (thousand jobs)                     |                                          | 0.004 (300m)                                              |                      | 0.004 (300m)                     |                               | 0.02 (400m)                                | 0.10 (400m)      |                      |
| University/college campus (ha)                           |                                          |                                                           |                      |                                  |                               | 0.02 (500m)                                |                  | 0.07 (300m)          |
| Off-street bike facility                                 | 1.15                                     | 1.59                                                      | 0.14                 |                                  |                               |                                            |                  |                      |
| On-street bike facility                                  |                                          | 0.58                                                      |                      |                                  |                               |                                            |                  |                      |
| Minor bike facility                                      |                                          |                                                           |                      |                                  |                               |                                            |                  |                      |
| Intersection density (miles/sq mile)                     |                                          |                                                           |                      |                                  |                               | 0.003 (200m)                               |                  | 0.01 (1250m)         |
| Multimodal network density (miles/sq mile)               |                                          |                                                           |                      |                                  | 0.01 (100m)                   | 0.03 (300m)                                |                  |                      |
| Local road (km)                                          |                                          |                                                           |                      | 0.81 (100m)                      | 0.69 (200m)                   |                                            |                  |                      |
| Bike commute mode share (%)                              |                                          | 0.08 (1250m)                                              |                      |                                  | -                             | -                                          | -                | -                    |
| Walking commute mode share (%)                           | -                                        | -                                                         | -                    | -                                |                               |                                            |                  |                      |
| Transit stops                                            | -                                        | -                                                         | -                    | -                                | -0.002 (3000m)                | -0.001 (3000m)                             |                  |                      |
| Transit commute mode share (%)                           | -                                        | -                                                         | -                    | -                                |                               |                                            |                  |                      |
| Zero-car households (thousand households)                |                                          |                                                           |                      |                                  |                               | 3.32 (200m)                                |                  |                      |
| Income (thousand dollars)                                |                                          |                                                           | 0.01 (3000m)         | 0.01 (3000m)                     |                               |                                            |                  |                      |
| Population below 18 years old                            | -0.03 (100m)                             |                                                           | -0.07 (2000m)        | -0.08 (3000m)                    | -0.06 (1000m)                 |                                            |                  |                      |
| Population 19-45 years old                               |                                          |                                                           |                      |                                  |                               |                                            | 0.03 (1000m)     |                      |
| Population 45-65 years old                               | -0.06 (1250m)                            |                                                           | -0.04 (500m)         | -0.05 (500m)                     |                               |                                            |                  |                      |
| Population above 65 years old                            |                                          |                                                           | -0.02 (200m)         | -0.01 (500m)                     | -0.02 (3000m)                 |                                            |                  |                      |
| Temperature                                              |                                          |                                                           |                      |                                  |                               |                                            |                  |                      |
| Precipitation                                            | -5.26                                    |                                                           |                      | 0.17                             |                               |                                            |                  |                      |
| <b>N</b>                                                 | <b>57</b>                                | <b>311</b>                                                | <b>159</b>           | <b>235</b>                       | <b>154</b>                    | <b>221</b>                                 | <b>97</b>        | <b>166</b>           |
| <b>Adj-R<sup>2</sup></b>                                 | <b>0.40</b>                              | <b>0.39</b>                                               | <b>0.40</b>          | <b>0.61</b>                      | <b>0.60</b>                   | <b>0.71</b>                                | <b>0.44</b>      | <b>0.65</b>          |
| MSAs <sup>b</sup>                                        | BOS, COL,<br>LA, MAD,<br>PHI, TUC,<br>DC | BOS, CLE,<br>LAW, LA,<br>MAD, MIN,<br>PHI, SF,<br>TUC, DC | COL, LA,<br>MAD, TUC | LA, MAD,<br>MAN, SF,<br>STL, TUC | COL, MAD,<br>NYC, PHI,<br>TUC | CLE, LAW,<br>MAD, MIN,<br>NYC, PHI,<br>TUC | BOS, COL,<br>TUC | MAN, SF,<br>STL, TUC |

<sup>a</sup> Buffer sizes are shown in parentheses. All dependent variables were log-transformed. All independent variables were significant at  $p < 0.05$  level. All models included climate region as control variable. Model abbreviations: Morning segment model (AM Seg.); Afternoon segment model (PM Seg.); Morning intersections model (AM Int.); Afternoon intersection model (PM Int.). Afternoon intersection model (PM Int.). Morning peak period is 7-9AM. Afternoon peak period is 5-7PM or 4-6PM.

<sup>b</sup> City abbreviations: Blacksburg (BBG), Boston (BOS), Champaign-Urbana (CU), Cleveland (CLE), Columbus (COL), Denver (DEN), Hartford (HAR), Lawrence (LAW), Los Angeles (LA), Madison (MAD), Manhattan (MAN), Minneapolis (MIN), New York City (NYC), Philadelphia (PHI), Portland (POR), San Francisco (SF), Seattle (SEA), St Louis (STL), Tucson (TUC), Washington DC (DC).

Table S7. Sensitivity analysis 2: Disaggregate employment data model results (with standardized coefficients) <sup>a</sup>

| Independent variable          | Bicycle                                   |                                                                   |                                          |                                                         | Pedestrian Models                           |                                                                |                                 |                                                    |
|-------------------------------|-------------------------------------------|-------------------------------------------------------------------|------------------------------------------|---------------------------------------------------------|---------------------------------------------|----------------------------------------------------------------|---------------------------------|----------------------------------------------------|
|                               | AM Seg.                                   | PM Seg.                                                           | AM Int.                                  | PM Int.                                                 | AM Seg.                                     | PM Seg.                                                        | AM Int.                         | PM Int.                                            |
| Water                         |                                           | 0.09 (200m)                                                       | 0.07 (100m)                              | 0.07 (750m)                                             | 0.18 (3000m)                                |                                                                |                                 | 0.03 (750m)                                        |
| Park                          |                                           | -0.05 (750m)                                                      |                                          | 0.02 (500m)                                             | -0.06 (200m)                                | -0.05 (1000m)                                                  | 0.05 (400m)                     | 0.07 (500m)                                        |
| Household density             |                                           |                                                                   |                                          |                                                         | 0.42 (1000m)                                | 0.12 (200m)                                                    |                                 | 0.04 (1000m)                                       |
| Retail job                    |                                           | -0.01 (100m)                                                      |                                          |                                                         |                                             |                                                                |                                 |                                                    |
| Office job                    |                                           |                                                                   | -0.04 (300m)                             |                                                         |                                             |                                                                | 0.04 (100m)                     | 0.04 (100m)                                        |
| Service job                   |                                           | 0.21 (3000m)                                                      |                                          | 0.18 (3000m)                                            | 0.16 (300m)                                 | 0.13 (200m)                                                    |                                 |                                                    |
| Entertainment job             |                                           |                                                                   | 0.12 (2500m)                             |                                                         |                                             |                                                                |                                 |                                                    |
| Industry job                  |                                           | 0.11 (1250m)                                                      |                                          |                                                         | 0.03 (750m)                                 |                                                                | -0.06 (3000m)                   | -0.02 (300m)                                       |
| University/college campus     |                                           |                                                                   | 0.16 (400m)                              | 0.10 (500m)                                             | 0.03 (100m)                                 | 0.06 (500m)                                                    | 0.20 (200m)                     | 0.21 (300m)                                        |
| Off-street bike facility      | 0.31                                      | 0.25                                                              | 0.16                                     | 0.13                                                    |                                             |                                                                |                                 |                                                    |
| On-street bike facility       | 0.10                                      | 0.09                                                              | 0.13                                     | 0.13                                                    |                                             |                                                                |                                 |                                                    |
| Minor bike facility           |                                           |                                                                   |                                          | 0.05                                                    |                                             |                                                                |                                 |                                                    |
| Intersection density          |                                           | 0.08 (400m)                                                       | 0.14 (2000m)                             | 0.09 (750m)                                             |                                             | 0.26 (750m)                                                    |                                 | 0.23 (1500m)                                       |
| Multimodal network density    | 0.37 (3000m)                              | 0.06 (200m)                                                       |                                          | 0.12 (1000m)                                            | 0.03 (100m)                                 | 0.02 (100m)                                                    | 0.06 (100m)                     | 0.08 (100m)                                        |
| Local road                    | -0.09 (500m)                              | -0.07 (750m)                                                      |                                          |                                                         | 0.12 (2000m)                                | 0.13 (1250m)                                                   | 0.24 (2000m)                    | 0.13 (750m)                                        |
| Bike commute mode share       | 0.29 (750m)                               | 0.18 (1000m)                                                      | 0.36 (3000m)                             | 0.23 (3000m)                                            | -                                           | -                                                              | -                               | -                                                  |
| Walking commute mode share    | -                                         | -                                                                 | -                                        | -                                                       | -0.17 (3000m)                               |                                                                | 0.20 (100m)                     | 0.15 (400m)                                        |
| Transit stops                 | -                                         | -                                                                 | -                                        | -                                                       | 0.08 (400m)                                 | -0.20 (3000m)                                                  | 0.05 (100m)                     | 0.08 (100m)                                        |
| Transit commute mode share    | -                                         | -                                                                 | -                                        | -                                                       | -0.11 (3000m)                               |                                                                |                                 | -0.15 (3000m)                                      |
| Zero-car households           |                                           |                                                                   |                                          | 0.05 (100m)                                             |                                             | 0.37 (3000m)                                                   | 0.12 (750m)                     | 0.08 (100m)                                        |
| Income                        | 0.20 (3000m)                              | -0.05 (750m)                                                      | 0.16 (2500m)                             | 0.06 (3000m)                                            | -0.08 (2000m)                               |                                                                |                                 | -0.08 (100m)                                       |
| Population below 18 years old |                                           | -0.05 (100m)                                                      |                                          | -0.08 (500m)                                            |                                             |                                                                |                                 |                                                    |
| Population 19-45 years old    |                                           | 0.13 (500m)                                                       |                                          |                                                         |                                             |                                                                |                                 |                                                    |
| Population 45-65 years old    | -0.19 (100m)                              | 0.04 (3000m)                                                      |                                          | -0.06 (100m)                                            |                                             |                                                                |                                 |                                                    |
| Population above 65 years old |                                           |                                                                   |                                          | -0.08 (1250m)                                           | -0.09 (200m)                                | 0.07 (3000m)                                                   |                                 |                                                    |
| Temperature                   |                                           | -0.04                                                             |                                          |                                                         | 0.07                                        |                                                                |                                 |                                                    |
| Precipitation                 | -0.18                                     |                                                                   |                                          | 0.03                                                    |                                             |                                                                |                                 |                                                    |
| <b>N</b>                      | <b>1,132</b>                              | <b>3,276</b>                                                      | <b>1,917</b>                             | <b>2,533</b>                                            | <b>1,539</b>                                | <b>2,526</b>                                                   | <b>1,196</b>                    | <b>1,655</b>                                       |
| <b>Adj-R<sup>2</sup></b>      | <b>0.49</b>                               | <b>0.49</b>                                                       | <b>0.48</b>                              | <b>0.61</b>                                             | <b>0.64</b>                                 | <b>0.73</b>                                                    | <b>0.46</b>                     | <b>0.60</b>                                        |
| MSAs <sup>b</sup>             | BBG, BOS, COL, LA, MAD, PHI, SEA, TUC, DC | BBG, BOS, CLE, HAR, LAW, LA, MAD, MIN, PHI, POR, SF, SEA, TUC, DC | BOS, CU, COL, HAR, LA, MAD, SEA, TUC, DC | BOS, DEN, HAR, LA, MAD, MAN, POR, SF, SEA, STL, TUC, DC | BBG, BOS, COL, HAR, MAD, NYC, PHI, SEA, TUC | BBG, BOS, CLE, HAR, LAW, MAD, MIN, NYC, PHI, POR, SF, SEA, TUC | BOS, CU, COL, HAR, SEA, TUC, DC | BOS, CU, HAR, LAW, MAN, POR, SF, SEA, STL, TUC, DC |

<sup>a</sup> Buffer sizes are shown in parentheses. All dependent variables were log-transformed. The standardized coefficients are interpreted as percent change in the 5th – 95th percentile range of pedestrian or bicycle volume. All independent variables were significant at  $p < 0.05$  level. All models included climate region as control variable. Model abbreviations: Morning segment model (AM Seg.); Afternoon segment model (PM Seg.); Morning intersections model (AM Int.); Afternoon intersection model (PM Int.). Afternoon intersection model (PM Int.). Morning peak period is 7-9AM. Afternoon peak period is 5-7PM or 4-6PM.

<sup>b</sup> City abbreviations: Blacksburg (BBG), Boston (BOS), Champaign-Urbana (CU), Cleveland (CLE), Columbus (COL), Denver (DEN), Hartford (HAR), Lawrence (LAW), Los Angeles (LA), Madison (MAD), Manhattan (MAN), Minneapolis (MIN), New York City (NYC), Philadelphia (PHI), Portland (POR), San Francisco (SF), Seattle (SEA), St Louis (STL), Tucson (TUC), Washington DC (DC). Champaign-Urbana (CU) was excluded from the PM Intersection model because its count dates were unknown, thus we did not have weather variables for this MSA

Table S8. Sensitivity analysis 2: Disaggregate employment data model results (with unstandardized coefficients) <sup>a</sup>

| Independent variable                                     | Bicycle Models                            |                                                                   |                                          |                                                         | Pedestrian Model                            |                                                                |                                 |                                                    |
|----------------------------------------------------------|-------------------------------------------|-------------------------------------------------------------------|------------------------------------------|---------------------------------------------------------|---------------------------------------------|----------------------------------------------------------------|---------------------------------|----------------------------------------------------|
|                                                          | AM Seg.                                   | PM Seg.                                                           | AM Int.                                  | PM Int.                                                 | AM Seg.                                     | PM Seg.                                                        | AM Int.                         | PM Int.                                            |
| Water (ha)                                               |                                           | 0.12 (200m)                                                       | 0.46 (100m)                              | 0.01 (750m)                                             | 0.001 (3000m)                               |                                                                |                                 | 0.01 (750m)                                        |
| Park (ha)                                                |                                           | -0.01 (750m)                                                      |                                          | 0.01 (500m)                                             | -0.12 (200m)                                | -0.004 (1000m)                                                 | 0.04 (400m)                     | 0.03 (500m)                                        |
| Household density (thousand households/km <sup>2</sup> ) |                                           |                                                                   |                                          |                                                         | 0.05 (1000m)                                | 0.41 (200m)                                                    |                                 | 0.04 (1000m)                                       |
| Retail job (thousand jobs)                               |                                           | -0.95 (100m)                                                      |                                          |                                                         |                                             |                                                                |                                 |                                                    |
| Office job (thousand jobs)                               |                                           |                                                                   | -0.15 (300m)                             |                                                         |                                             |                                                                | 2.49 (100m)                     | 2.18 (100m)                                        |
| Service job (thousand jobs)                              |                                           | 0.01 (3000m)                                                      |                                          | 0.01 (3000m)                                            | 0.05 (300m)                                 | 0.11 (200m)                                                    |                                 |                                                    |
| Entertainment job (thousand jobs)                        |                                           |                                                                   | 0.04 (2500m)                             |                                                         |                                             |                                                                |                                 |                                                    |
| Industry job (thousand jobs)                             |                                           | 0.03 (1250m)                                                      |                                          |                                                         | 0.01 (750m)                                 |                                                                | -0.02 (3000m)                   | -0.48 (300m)                                       |
| University/college campus (ha)                           |                                           |                                                                   | 0.002 (400m)                             | 0.001 (500m)                                            | 0.03 (100m)                                 | 0.002 (500m)                                                   | 0.01 (200m)                     | 0.01 (300m)                                        |
| Off-street bike facility                                 | 1.50                                      | 1.18                                                              | 0.17                                     | 0.17                                                    |                                             |                                                                |                                 |                                                    |
| On-street bike facility                                  | 0.50                                      | 0.44                                                              | 0.07                                     | 0.08                                                    |                                             |                                                                |                                 |                                                    |
| Minor bike facility                                      |                                           |                                                                   |                                          | 0.06                                                    |                                             |                                                                |                                 |                                                    |
| Intersection density (miles/sq mile)                     |                                           | 0.001 (400m)                                                      | 0.003 (2000m)                            | 0.002 (750m)                                            |                                             | 0.01 (750m)                                                    |                                 | 0.01 (1500m)                                       |
| Multimodal network density (miles/sq mile)               | 0.40 (3000m)                              | 0.02 (200m)                                                       |                                          | 0.10 (1000m)                                            | 0.01 (100m)                                 | 0.01 (100m)                                                    | 0.06 (100m)                     | 0.08 (100m)                                        |
| Local road (km)                                          | -0.04 (500m)                              | -0.01 (750m)                                                      |                                          |                                                         | 0.01 (2000m)                                | 0.02 (1250m)                                                   | 0.01 (2000m)                    | 0.03 (750m)                                        |
| Bike commute mode share (%)                              | 0.11 (750m)                               | 0.09 (1000m)                                                      | 0.13 (3000m)                             | 0.10 (3000m)                                            | -                                           | -                                                              | -                               | -                                                  |
| Walking commute mode share (%)                           | -                                         | -                                                                 | -                                        | -                                                       | -0.04 (3000m)                               |                                                                | 0.02 (100m)                     | 0.02 (400m)                                        |
| Transit stops                                            | -                                         | -                                                                 | -                                        | -                                                       | 0.01 (400m)                                 | -0.002 (3000m)                                                 | 0.09 (100m)                     | 0.12 (100m)                                        |
| Transit commute mode share (%)                           | -                                         | -                                                                 | -                                        | -                                                       | -0.04 (3000m)                               |                                                                |                                 | -0.05 (3000m)                                      |
| Zero-car households (thousand households)                |                                           |                                                                   |                                          | 3.14 (100m)                                             |                                             | 0.03 (3000m)                                                   | 0.31 (750m)                     | 10.18 (100m)                                       |
| Income (thousand dollars)                                | 0.01 (3000m)                              | -0.003 (750m)                                                     | 0.01 (2500m)                             | 0.004 (3000m)                                           | -0.01 (2000m)                               |                                                                |                                 | -0.01 (100m)                                       |
| Population below 18 years old                            |                                           | -0.01 (100m)                                                      |                                          | -0.01 (500m)                                            |                                             |                                                                |                                 |                                                    |
| Population 19-45 years old                               |                                           | 0.01 (500m)                                                       |                                          |                                                         |                                             |                                                                |                                 |                                                    |
| Population 45-65 years old                               | -0.03 (100m)                              | 0.01 (3000m)                                                      |                                          | -0.01 (100m)                                            |                                             |                                                                |                                 |                                                    |
| Population above 65 years old                            |                                           |                                                                   |                                          | -0.01 (1250m)                                           | -0.01 (200m)                                | 0.01 (3000m)                                                   |                                 |                                                    |
| Temperature                                              |                                           | -0.01                                                             |                                          |                                                         | 0.02                                        |                                                                |                                 |                                                    |
| Precipitation                                            | -0.10                                     |                                                                   |                                          | 0.09                                                    |                                             |                                                                |                                 |                                                    |
| <b>N</b>                                                 | <b>1,132</b>                              | <b>3,276</b>                                                      | <b>1,917</b>                             | <b>2,533</b>                                            | <b>1,539</b>                                | <b>2,526</b>                                                   | <b>1,196</b>                    | <b>1,655</b>                                       |
| <b>Adj-R<sup>2</sup></b>                                 | <b>0.49</b>                               | <b>0.49</b>                                                       | <b>0.48</b>                              | <b>0.61</b>                                             | <b>0.64</b>                                 | <b>0.73</b>                                                    | <b>0.46</b>                     | <b>0.60</b>                                        |
| MSAs <sup>b</sup>                                        | BBG, BOS, COL, LA, MAD, PHI, SEA, TUC, DC | BBG, BOS, CLE, HAR, LAW, LA, MAD, MIN, PHI, POR, SF, SEA, TUC, DC | BOS, CU, COL, HAR, LA, MAD, SEA, TUC, DC | BOS, DEN, HAR, LA, MAD, MAN, POR, SF, SEA, STL, TUC, DC | BBG, BOS, COL, HAR, MAD, NYC, PHI, SEA, TUC | BBG, BOS, CLE, HAR, LAW, MAD, MIN, NYC, PHI, POR, SF, SEA, TUC | BOS, CU, COL, HAR, SEA, TUC, DC | BOS, CU, HAR, LAW, MAN, POR, SF, SEA, STL, TUC, DC |

<sup>a</sup> Buffer sizes are shown in parentheses. All dependent variables were log-transformed. All independent variables were significant at  $p < 0.05$  level. All models included climate region as control variable. Model abbreviations: Morning segment model (AM Seg.); Afternoon segment model (PM Seg.); Morning intersections model (AM Int.); Afternoon intersection model (PM Int.). Afternoon intersection model (PM Int.). Morning peak period is 7-9AM. Afternoon peak period is 5-7PM or 4-6PM.

<sup>b</sup> City abbreviations: Blacksburg (BBG), Boston (BOS), Champaign-Urbana (CU), Cleveland (CLE), Columbus (COL), Denver (DEN), Hartford (HAR), Lawrence (LAW), Los Angeles (LA), Madison (MAD), Manhattan (MAN), Minneapolis (MIN), New York City (NYC), Philadelphia (PHI), Portland (POR), San Francisco (SF), Seattle (SEA), St Louis (STL), Tucson (TUC), Washington DC (DC). Champaign-Urbana (CU) was excluded from the PM Intersection model because its count dates were unknown, thus we did not have weather variables for this MSA

Table S9. Correlation analysis of employment types

|                     |          |          |         |         |         |
|---------------------|----------|----------|---------|---------|---------|
| <b>100m buffer</b>  | Ret_100  | Off_100  | In_100  | En_100  | Sv_100  |
|                     | Ret_100  | 1        |         |         |         |
|                     | Off_100  | 0.5389   | 1       |         |         |
|                     | In_100   | 0.1345   | 0.2445  | 1       |         |
|                     | En_100   | 0.5326   | 0.6018  | 0.1389  | 1       |
|                     | Sv_100   | 0.5526   | 0.7413  | 0.2098  | 0.5879  |
|                     |          |          |         |         | 1       |
| <b>500m buffer</b>  | Ret_500  | Off_500  | In_500  | En_500  | Sv_500  |
|                     | Ret_500  | 1        |         |         |         |
|                     | Off_500  | 0.7175   | 1       |         |         |
|                     | In_500   | 0.4738   | 0.5099  | 1       |         |
|                     | En_500   | 0.7797   | 0.7827  | 0.4218  | 1       |
|                     | Sv_500   | 0.7909   | 0.8916  | 0.5667  | 0.7972  |
|                     |          |          |         |         | 1       |
| <b>1000m buffer</b> | Ret_1000 | Off_1000 | In_1000 | En_1000 | Sv_1000 |
|                     | Ret_1000 | 1        |         |         |         |
|                     | Off_1000 | 0.8694   | 1       |         |         |
|                     | In_1000  | 0.7348   | 0.7123  | 1       |         |
|                     | En_1000  | 0.9279   | 0.8657  | 0.7059  | 1       |
|                     | Sv_1000  | 0.9289   | 0.9271  | 0.7897  | 0.907   |
|                     |          |          |         |         | 1       |
| <b>1500m buffer</b> | Ret_1500 | Off_1500 | In_1500 | En_1500 | Sv_1500 |
|                     | Ret_1500 | 1        |         |         |         |
|                     | Off_1500 | 0.8879   | 1       |         |         |
|                     | In_1500  | 0.869    | 0.8025  | 1       |         |
|                     | En_1500  | 0.9667   | 0.8765  | 0.8308  | 1       |
|                     | Sv_1500  | 0.9594   | 0.9271  | 0.877   | 0.9437  |
|                     |          |          |         |         | 1       |
| <b>3000m buffer</b> | Ret_3000 | Off_3000 | In_3000 | En_3000 | Sv_3000 |
|                     | Ret_3000 | 1        |         |         |         |
|                     | Off_3000 | 0.9271   | 1       |         |         |
|                     | In_3000  | 0.9363   | 0.9436  | 1       |         |
|                     | En_3000  | 0.984    | 0.9151  | 0.9114  | 1       |
|                     | Sv_3000  | 0.9729   | 0.9461  | 0.9365  | 0.9789  |
|                     |          |          |         |         | 1       |

Variable coding: *Ret*: Retail, *Off*: Office, *In*: Industry, *En*: Entertainment, *Sv*: Service. Buffer sizes are shown after the underscore (Ret\_100 stands for retail jobs within a 100m buffer).



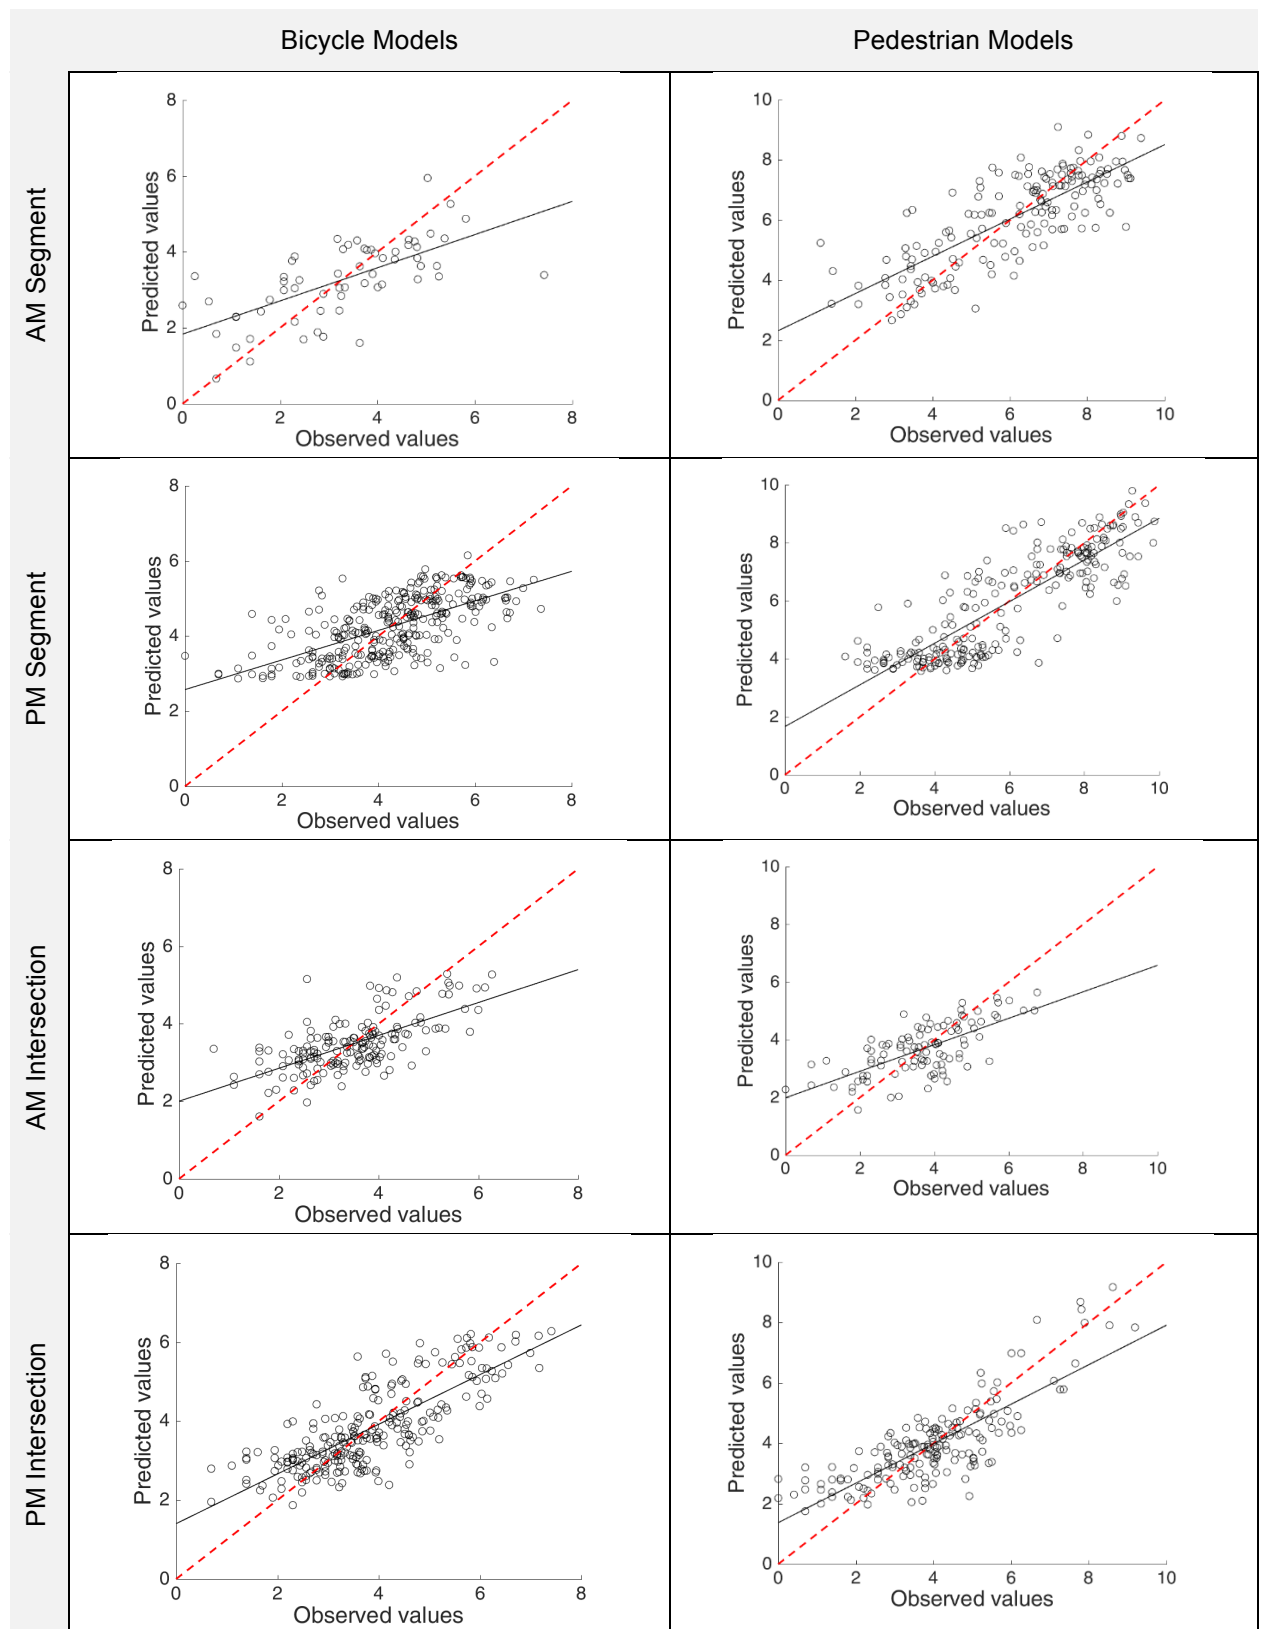

Figure S1. Scatter plots of predicted vs. observed values for the temporally averaged models. The dashed red line is the 1:1 line; the best fit line is shown in solid black.

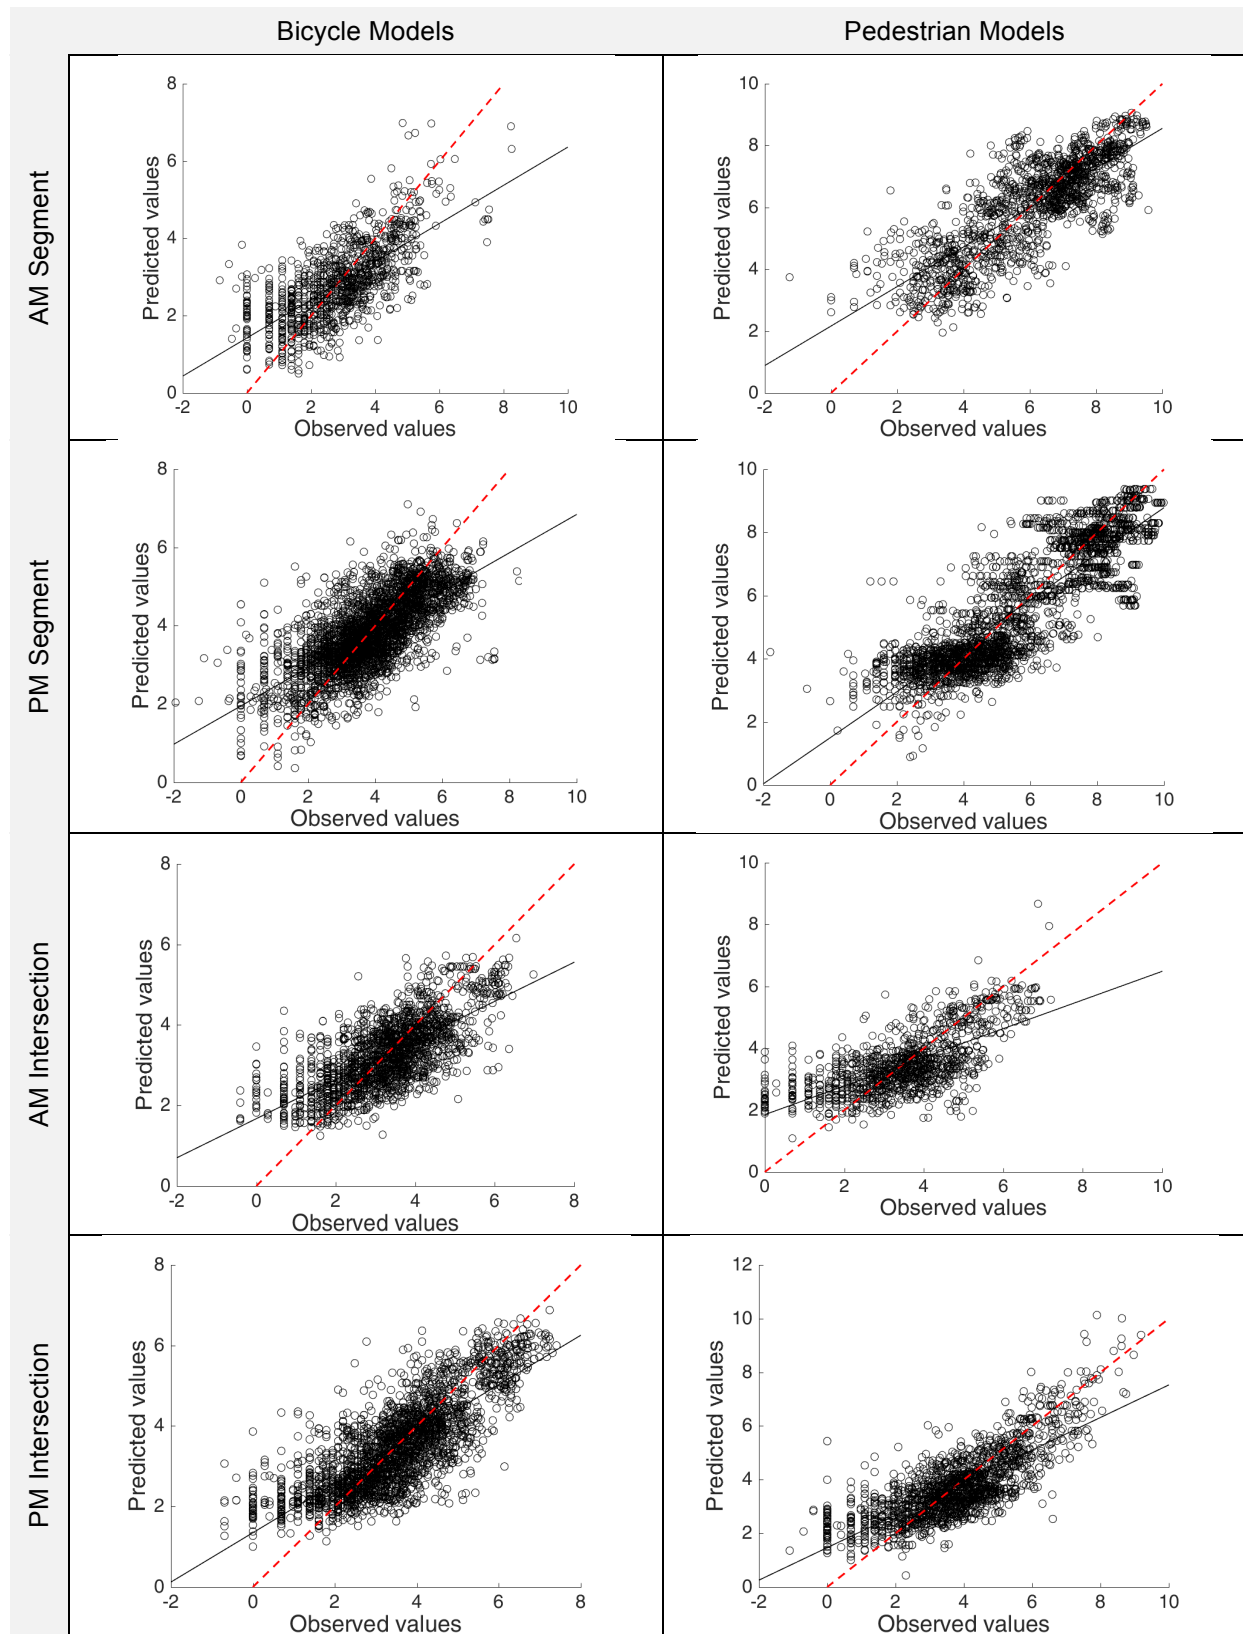

Figure S2. Scatter plots of predicted vs. observed values for disaggregated employment type models. The dashed red line is the 1:1 line; the best fit line is shown in solid black.

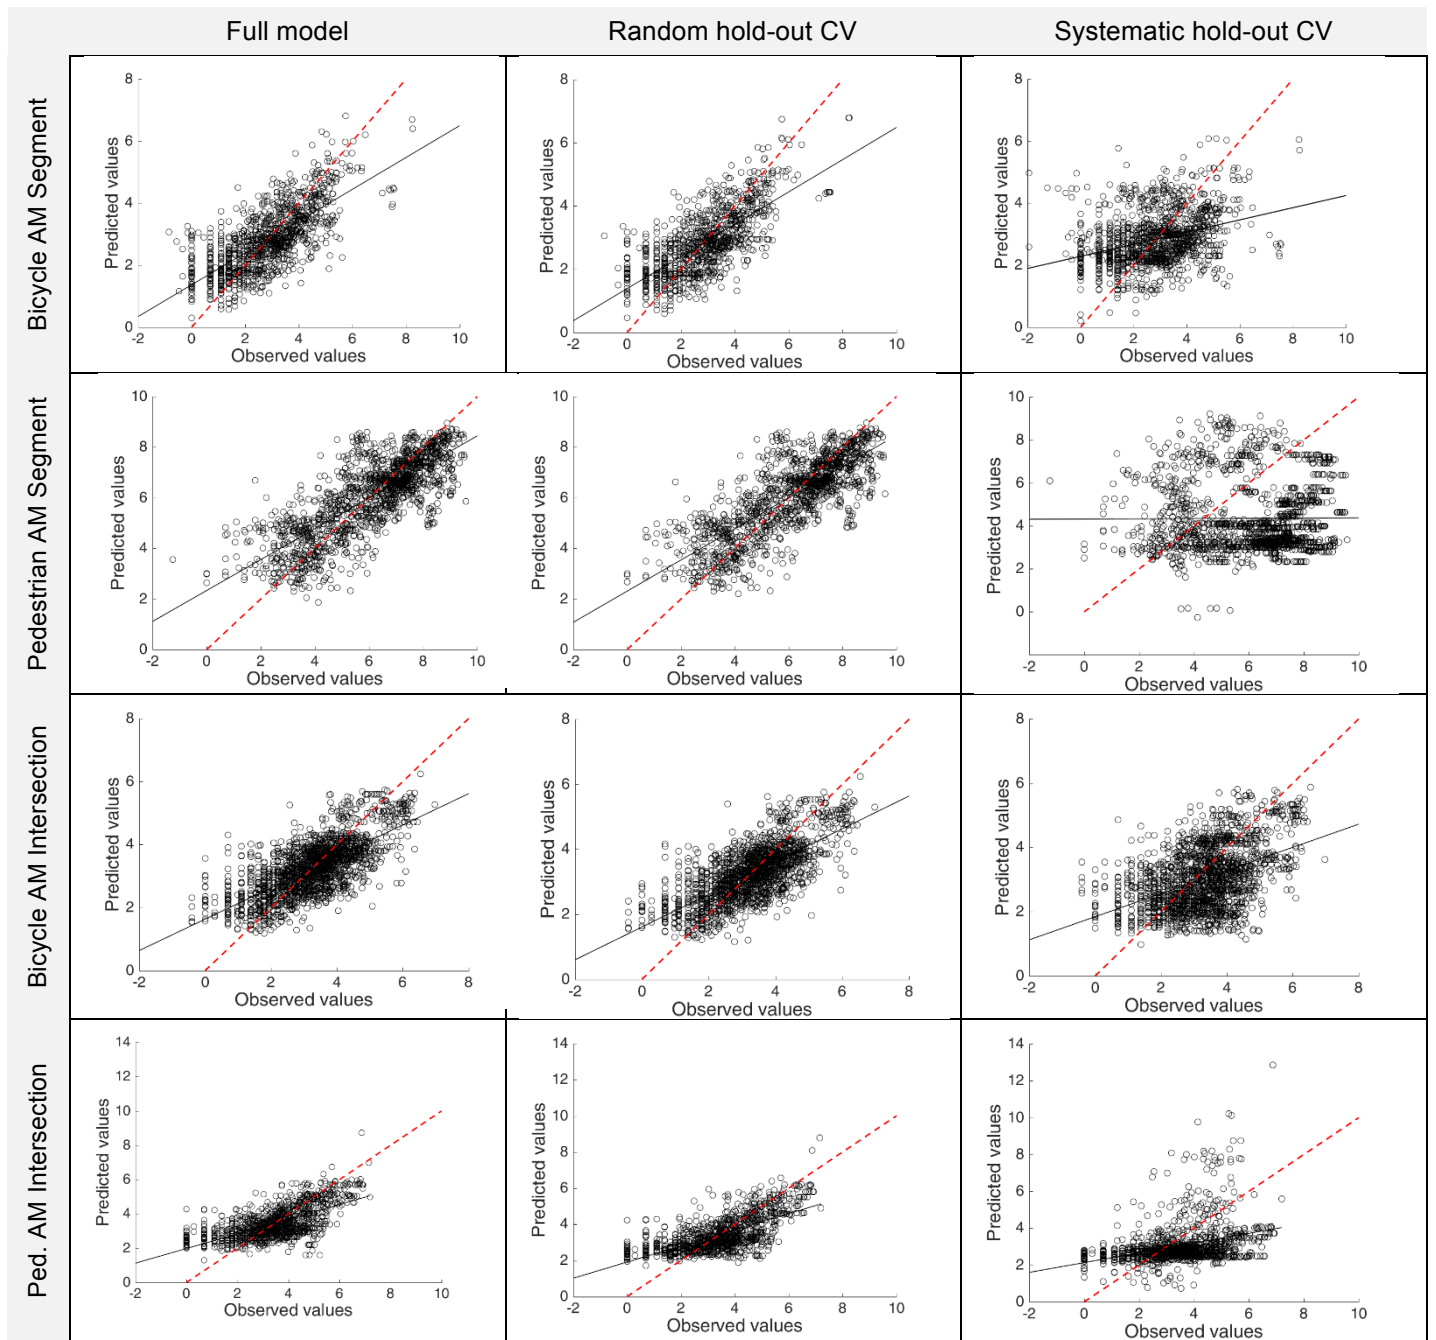

Figure S3. Cross validation (CV) results: Plots of predicted vs. observed values of AM peak-period models for each cross-validation approach. The dashed red line is the 1:1 line; the best fit line is shown in solid black.

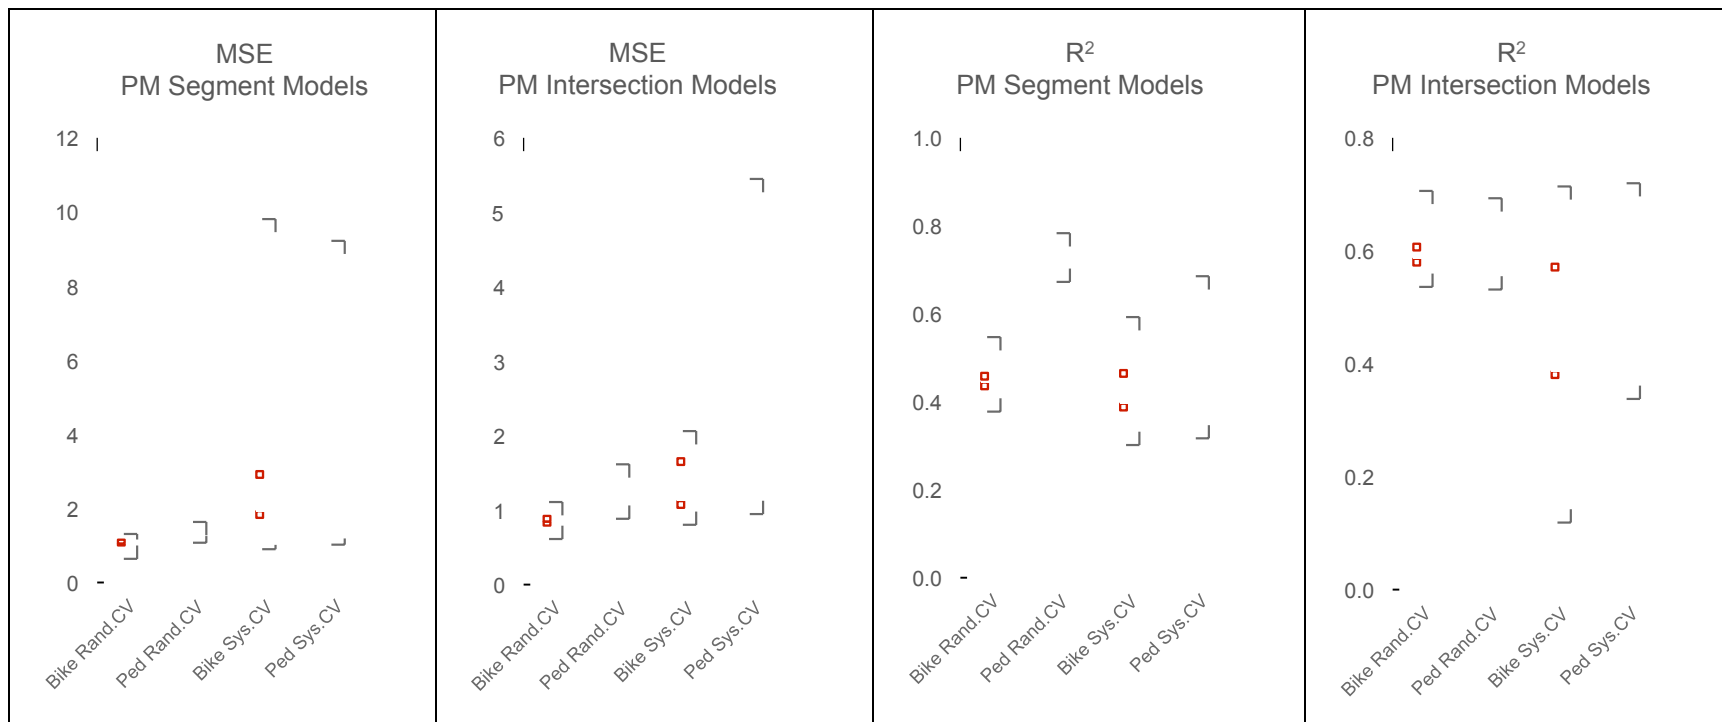

Figure S4. Cross validation results: Box plots of MSE and adjusted  $R^2$  for the PM models. Model abbreviations: Bicycle, random hold-out (Bike Rand.CV); Pedestrian, random hold-out (Ped Rand.CV); Bicycle, systematic hold-out (Bike Sys.CV); Pedestrian, systematic hold-out (Ped Sys.CV). The whiskers represent the min and max values, the boxes represent the 25, 50, and 75 percentile values of all cross-validated models' MSE and  $R^2$ .
